# Supplementary material for: Low 25(OH)-vitamin D concentrations are associated with emotional and behavioral problems in German children and adolescents
Source: PLoS One. 2017 Aug 23;12(8):e0183091. doi: 10.1371/journal.pone.0183091 (PMC5568331; doi:10.1371/journal.pone.0183091)
Supplement: S6 Table — *Values per 1 SD Vitamin D = 26.74, 1Vitamin D + Age, 2Model a + Socioeconomic Status (SES), 3Model a + Migration Background, 4Fully adjusted (Age + SES + Migration Background + Body Mass Index + Tanner Stages). (DOCX) [file pone.0183091.s008.docx]

**S6 Table. Beta estimates and corresponding 95% confidence intervals (95% CI) per standard deviation (SD= 26.74) increase of Vitamin D on Strengths and Difficulties Questionnaire (SDQ)-Subscales of the self-ratings for girls aged 12-17 years using different adjusting sets in linear regression models.**

| **SDQ =** | **Model a1** | | | | | **Model b2** | | | | | **Model c3** | | | | | **Model d4** | | | | |
| --- | --- | --- | --- | --- | --- | --- | --- | --- | --- | --- | --- | --- | --- | --- | --- | --- | --- | --- | --- | --- |
|  | n | Beta* | 95% CI* | | p-value | n | Beta* | 95% CI* | | p-value | n | Beta* | 95% CI* | | p-value | n | Beta* | 95% CI* | | p-value |
| Lower | Upper | Lower | Upper | Lower | Upper | Lower | Upper |
| Emotional Problems | 1809 | -0.18 | -0.28 | -0.08 | 0.00 | 1794 | -0.17 | -0.27 | -0.07 | 0.00 | 1809 | -0.18 | -0.28 | -0.08 | 0.00 | 1761 | -0.16 | -0.26 | -0.06 | 0.00 |
| Conduct Problems | 1809 | -0.02 | -0.09 | 0.04 | 0.45 | 1794 | -0.01 | -0.07 | 0.06 | 0.87 | 1809 | -0.01 | -0.07 | 0.05 | 0.76 | 1761 | 0.01 | -0.05 | 0.08 | 0.69 |
| Hyperactivity | 1809 | 0.01 | -0.09 | 0.10 | 0.90 | 1794 | 0.01 | -0.08 | 0.11 | 0.78 | 1809 | 0.01 | -0.09 | 0.11 | 0.83 | 1761 | 0.02 | -0.08 | 0.12 | 0.69 |
| Peer Relationship Problems | 1809 | -0.15 | -0.22 | -0.08 | 0.00 | 1794 | -0.14 | -0.21 | -0.06 | 0.00 | 1809 | -0.14 | -0.22 | -0.07 | 0.00 | 1761 | -0.12 | -0.20 | -0.05 | 0.00 |
| Prosocial Behaviour | 1810 | -0.01 | -0.08 | 0.06 | 0.81 | 1795 | -0.01 | -0.08 | 0.07 | 0.86 | 1810 | -0.01 | -0.08 | 0.06 | 0.76 | 1762 | -0.02 | -0.09 | 0.06 | 0.68 |
| Total Difficulties Score | 1809 | -0.35 | -0.57 | -0.14 | 0.00 | 1794 | -0.30 | -0.51 | -0.08 | 0.01 | 1809 | -0.32 | -0.54 | -0.11 | 0.00 | 1761 | -0.25 | -0.47 | -0.03 | 0.02 |

* Values per 1 SD Vitamin D= 26.74

1 Vitamin D + Age

2 Model a + Socioeconomic Status (SES)

3 Model a + Migration Background

4 Fully adjusted (Age + SES + Migration Background + Body Mass Index + Tanner Stages)
